# Supplementary material
Source: publisher figshare collection journal article supplement (https://gsajournals.figshare.com/ndownloader/files/12349469)
Supplement: Supplementary file 1 [file 12349469]

## Sheet: Sheet1
Chrs	Variants detected using both BWA and Novoalign	Variants detected in only one alignment	Percentage of variants detected in only one alignment
2L	10348753	266618	2.51
2R	9133093	198359	2.13
3L	10605179	304291	2.79
3R	9924314	185110	1.83
X	5781233	126994	2.15
4	80051	718	0.89
M	4683	1167	19.95
Y	20662	6092	22.77
